# Supplementary material
Source: HighWire-hosted journal article supplement (https://www.annfammed.org/highwire/filestream/27029/field_highwire_adjunct_files/0/Ansari_VA.pdf)
Supplement: Ansari_VA.pdf [file Ansari_VA.pdf]

# A Population-Level Study of Trends in Family Physicians in Focused Practice (1993–2022)

This study examined long-term trends in focused practice—where family physicians provide care in a specific area rather than full-scope family medicine—and comprehensive care in Ontario, Canada.

**Fewer providing comprehensive care**

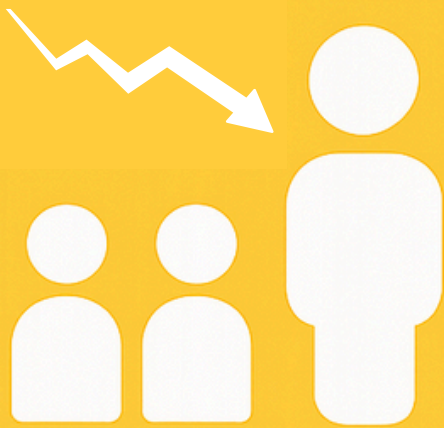

Family physician supply grew (104 to 118 per 100,000), while the number providing comprehensive care declined (71 to 64 per 100,000).

**A substantial share entered focused practice**

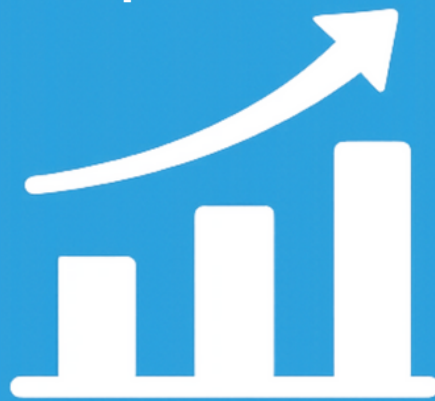

Of the additional 6,310 family physicians who entered the workforce, 39.5% (2,495/6,310) were in focused practice.

**Most prevalent focused practice types**

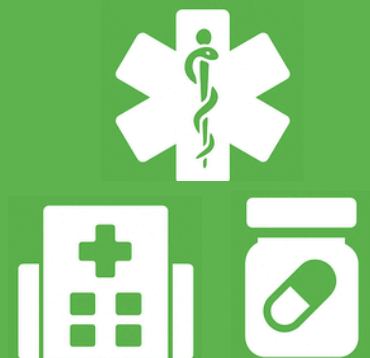

The 3 most prevalent focused practice types at the end of the study period were emergency (37.0%), hospitalist (26.5%), and addiction (8.3%) medicine.

**Source:** Ansari H, Glazier RH, Schultz SE, Kiran T, et al. Family physicians in focused practice in Ontario, Canada: a population-level study of trends from 1993/1994 through 2021/2022. *Ann Fam Med*. 2025;23:10.1370/afm.240377
